# Supplementary material
Source: ML conference proceedings conference paper supplement (https://openaccess.thecvf.com/content/WACV2024/html/Siddiquee_Brainomaly_Unsupervised_Neurologic_WACV_2024_paper.html)
Supplement: Supplementary file 1 [file Siddiquee_Brainomaly_Unsupervised_Neurologic_WACV_2024_supplemental.pdf]

## A. Supplementary Materials

### A.1. AUCp Metric Calculation

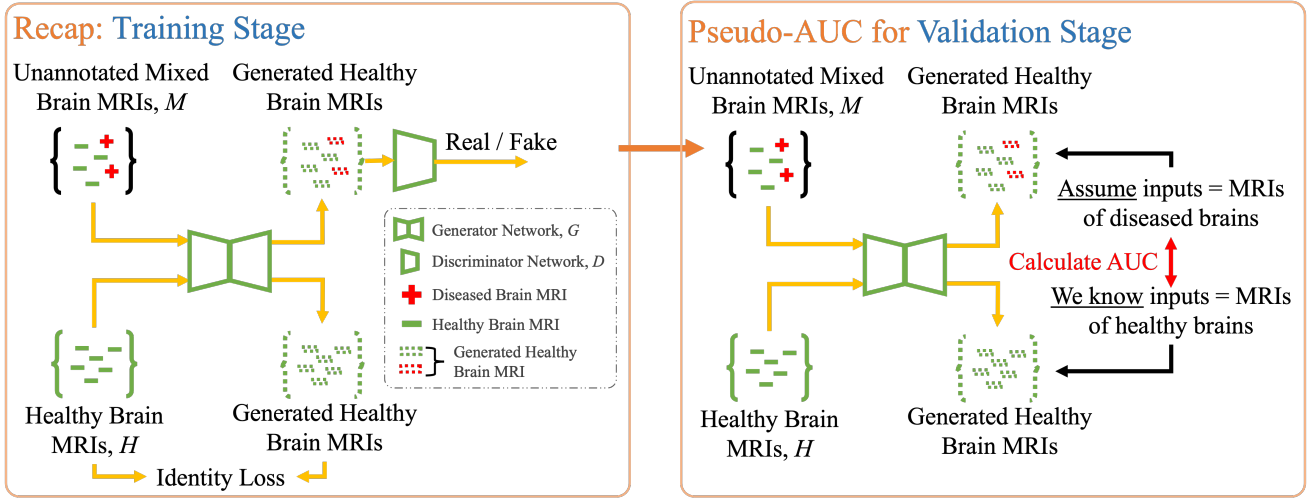

Figure 4. An overview of the proposed AUCp metric calculation. To calculate AUCp, we first generate the *disease detection scores* for each model, as discussed in Sec. 3.3. As we already know that the set  $H$  contains only healthy-brain MRIs, we assume the labels for MRIs in the unannotated mixed brain MRI set,  $M$ , to be diseased brains. Then, we use these *imperfect* annotations as ground truths along with the *disease detection scores* in the traditional AUC calculation resulting in AUCp scores. Once the AUCp scores are available for all the models, we select a model with the highest AUCp score for inference. In Sec. 6.3 we have also shown that AUCp sets a better-performing model for inference compared to FID, commonly used in existing works [34].

### A.2. Neural Network Architectures

A detailed neural network architecture for the discriminator is provided in Tab. 3 and for the generator is provided in Tab. 4. Both these networks are adopted from [13, 35, 34] with slight modification.

| Type                       | Operations                                               | Input Shape                          | Output Shape                         |
|----------------------------|----------------------------------------------------------|--------------------------------------|--------------------------------------|
| Input layer                | Conv2d (OC=64, KS=4, S=2, P=1),<br>LeakyReLU (NS=0.01)   | $(h, w, 3)$                          | $(\frac{h}{2}, \frac{w}{2}, 64)$     |
| Hidden layers              | Conv2d (OC=128, KS=4, S=2, P=1),<br>LeakyReLU (NS=0.01)  | $(\frac{h}{2}, \frac{w}{2}, 64)$     | $(\frac{h}{4}, \frac{w}{4}, 128)$    |
|                            | Conv2d (OC=256, KS=4, S=2, P=1),<br>LeakyReLU (NS=0.01)  | $(\frac{h}{4}, \frac{w}{4}, 128)$    | $(\frac{h}{8}, \frac{w}{8}, 256)$    |
|                            | Conv2d (OC=512, KS=4, S=2, P=1),<br>LeakyReLU (NS=0.01)  | $(\frac{h}{8}, \frac{w}{8}, 256)$    | $(\frac{h}{16}, \frac{w}{16}, 512)$  |
|                            | Conv2d (OC=1024, KS=4, S=2, P=1),<br>LeakyReLU (NS=0.01) | $(\frac{h}{16}, \frac{w}{16}, 512)$  | $(\frac{h}{32}, \frac{w}{32}, 1024)$ |
|                            | Conv2d (OC=2048, KS=4, S=2, P=1),<br>LeakyReLU (NS=0.01) | $(\frac{h}{32}, \frac{w}{32}, 1024)$ | $(\frac{h}{64}, \frac{w}{64}, 2048)$ |
| Output layer ( $D_{src}$ ) | Conv2d (OC=1, KS=3, S=1, P=1)                            | $(\frac{h}{64}, \frac{w}{64}, 2048)$ | $(\frac{h}{64}, \frac{w}{64}, 1)$    |

Table 3. Discriminator network architecture. OC, KS, S, P, and NS stand for output channels, kernel size, stride, padding, and negative slope, respectively.

| Type       | Operations                                                | Input Shape                       | Output Shape                      |
|------------|-----------------------------------------------------------|-----------------------------------|-----------------------------------|
| Encoder    | Conv2d (OC=64, KS=7, S=1, P=3), IN, ReLU                  | $(h, w, 3)$                       | $(h, w, 64)$                      |
|            | Conv2d (OC=128, KS=4, S=2, P=1), IN, ReLU                 | $(h, w, 64)$                      | $(\frac{h}{2}, \frac{w}{2}, 128)$ |
|            | Conv2d (OC=256, KS=4, S=2, P=1), IN, ReLU                 | $(\frac{h}{2}, \frac{w}{2}, 128)$ | $(\frac{h}{4}, \frac{w}{4}, 256)$ |
| Bottleneck | Residual Block: Conv2d (OC=256, KS=3, S=1, P=1), IN, ReLU | $(\frac{h}{4}, \frac{w}{4}, 256)$ | $(\frac{h}{4}, \frac{w}{4}, 256)$ |
|            | Residual Block: Conv2d (OC=256, KS=3, S=1, P=1), IN, ReLU | $(\frac{h}{4}, \frac{w}{4}, 256)$ | $(\frac{h}{4}, \frac{w}{4}, 256)$ |
|            | Residual Block: Conv2d (OC=256, KS=3, S=1, P=1), IN, ReLU | $(\frac{h}{4}, \frac{w}{4}, 256)$ | $(\frac{h}{4}, \frac{w}{4}, 256)$ |
|            | Residual Block: Conv2d (OC=256, KS=3, S=1, P=1), IN, ReLU | $(\frac{h}{4}, \frac{w}{4}, 256)$ | $(\frac{h}{4}, \frac{w}{4}, 256)$ |
|            | Residual Block: Conv2d (OC=256, KS=3, S=1, P=1), IN, ReLU | $(\frac{h}{4}, \frac{w}{4}, 256)$ | $(\frac{h}{4}, \frac{w}{4}, 256)$ |
|            | Residual Block: Conv2d (OC=256, KS=3, S=1, P=1), IN, ReLU | $(\frac{h}{4}, \frac{w}{4}, 256)$ | $(\frac{h}{4}, \frac{w}{4}, 256)$ |
| Decoder    | ConvTranspose2d (OC=128, KS=4, S=2, P=1), IN, ReLU        | $(\frac{h}{4}, \frac{w}{4}, 256)$ | $(\frac{h}{4}, \frac{w}{4}, 128)$ |
|            | ConvTranspose2d (OC=64, KS=4, S=2, P=1), IN, ReLU         | $(\frac{h}{2}, \frac{w}{2}, 128)$ | $(h, w, 64)$                      |
|            | ConvTranspose2d (OC=1, KS=7, S=1, P=3)                    | $(h, w, 64)$                      | $(h, w, 1)$                       |

Table 4. Generator network architecture. OC, KS, S, P, and IN stand for output channels, kernel size, stride, padding, and instance norm, respectively.

### A.3. Receiver Operating Characteristic Curves

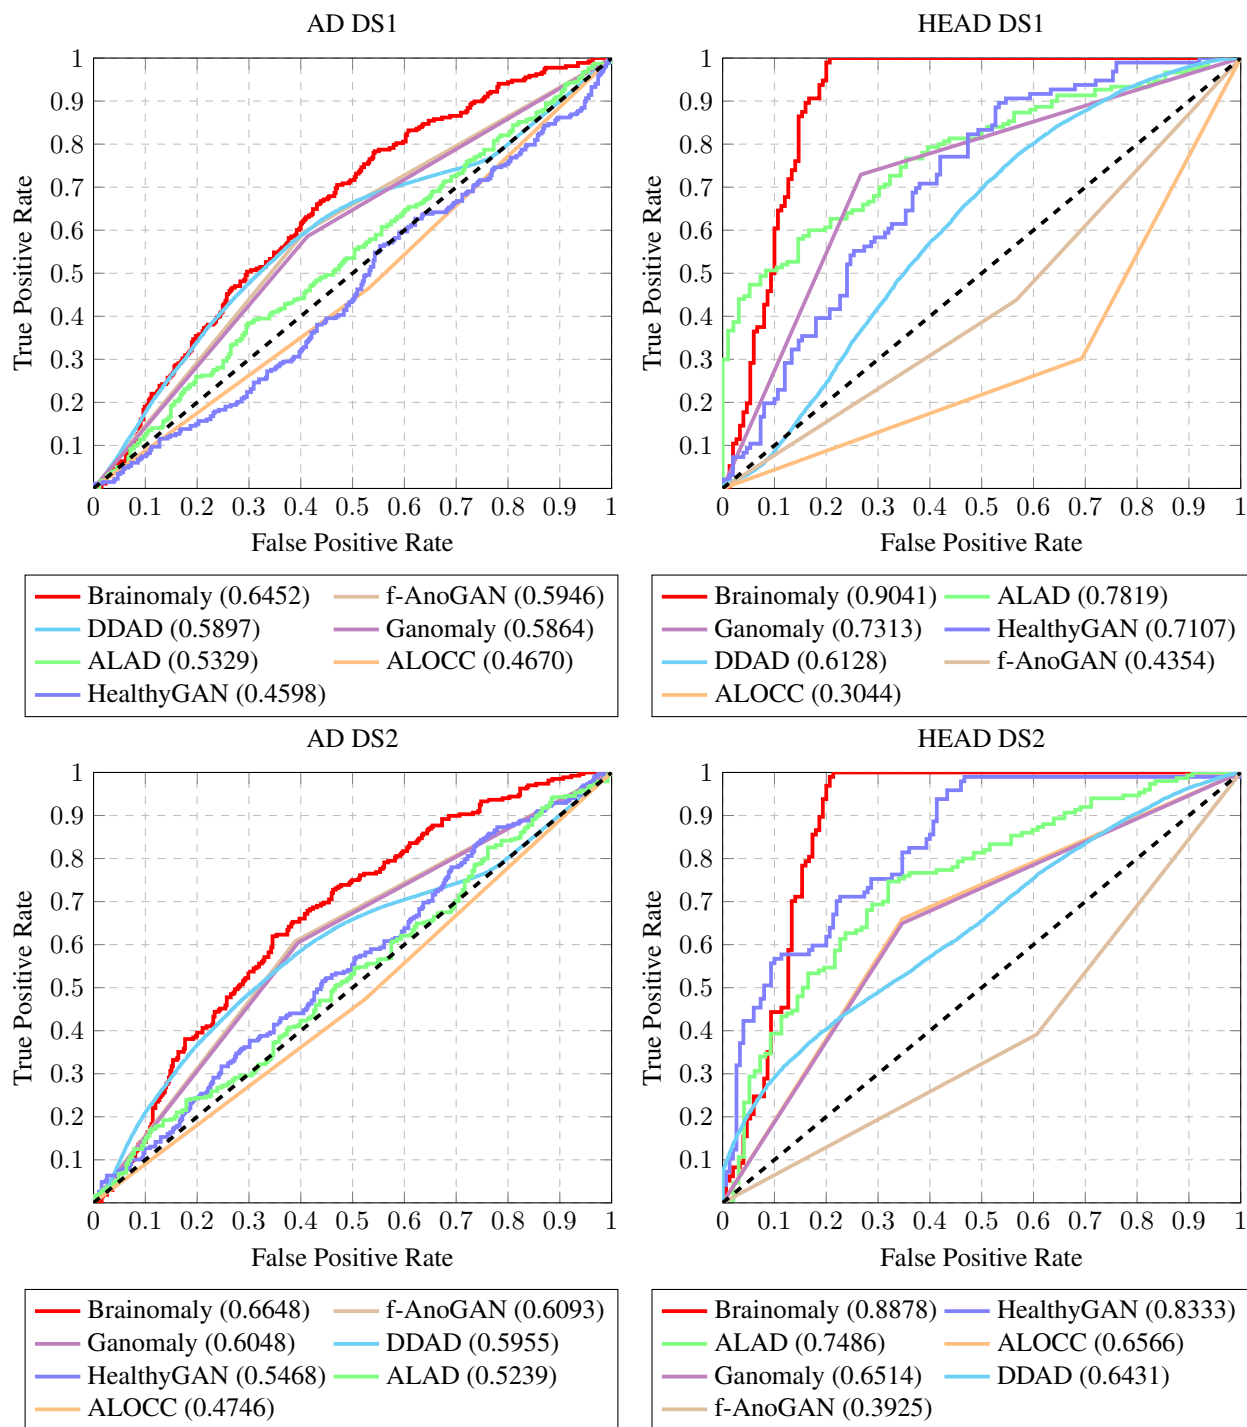

Figure 5. Receiver operative characteristics analyses for Alzheimer’s disease and headache detection. *AD DS1* and *AD DS2* on the left compares Alzheimer’s disease detection performances and *HEAD DS1* and *HEAD DS2* on the right compares headache detection performances. As discussed in Sec. 6, Brainomaly outperforms the existing methods across the tasks.
